# Supplementary material for: Transdiagnostic Brain Mapping in Developmental Disorders
Source: PubMed Central journal article supplement — Curr Biol. 2020 Apr 6;30(7):1245–1257.e4. doi: 10.1016/j.cub.2020.01.078 (PMC7139199; doi:10.1016/j.cub.2020.01.078), 2020-04-06
Supplement: mmc1.pdf [file mmc1.pdf]

**Current Biology, Volume 30**

**Supplemental Information**

**Transdiagnostic Brain Mapping  
in Developmental Disorders**

**Roma Siugzdaite, Joe Bathelt, Joni Holmes, and Duncan E. Astle**

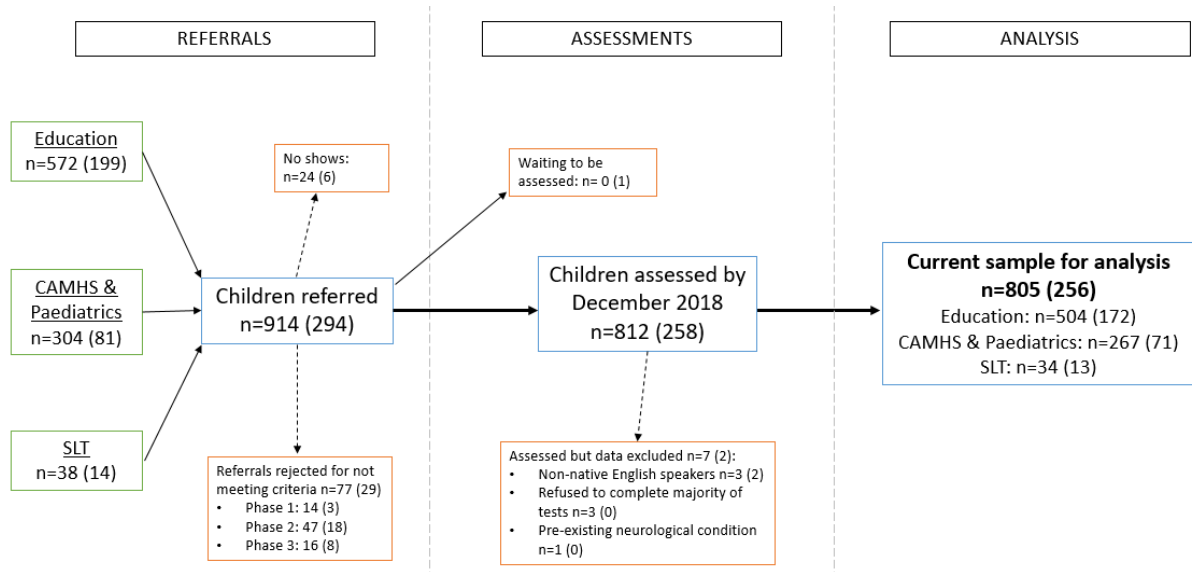

**Figure S1. Diagram showing recruitment avenues and exclusions for the referred sample. Related to Subjects details section in STAR Methods.**

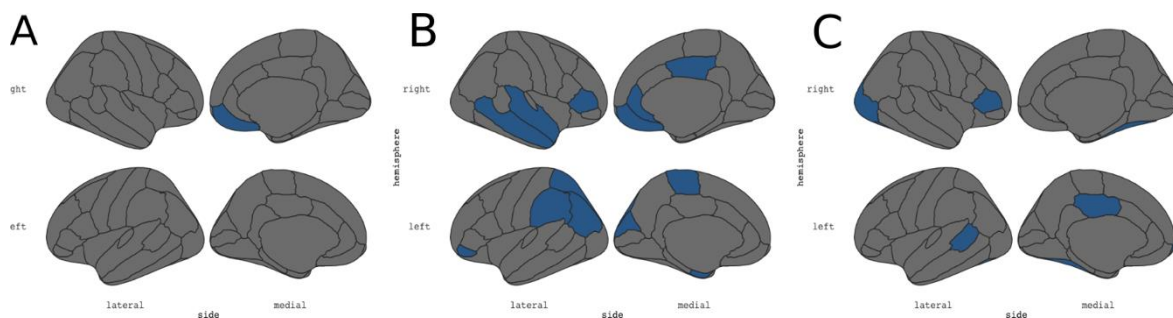

**Figure S2. Parcels identified by the feature selection. Related to STAR Methods.**

**(A) cortical thickness:** right medial orbito-frontal region;

**(B) gyrification:** left cuneus, left entorhinal, left inferior parietal, right medial orbito-frontal, right middle temporal, left paracentral, left pars orbitalis, right pars triangularis, right posterior cingulate, right rostral anterior cingulate, left superior parietal, right superior temporal, left supramarginal gyrus;

**(C) sulci depth:** left banks superior temporal, left and right fusiform, right lateral occipital, right pars triangularis, left posterior cingulate, left frontal pole.

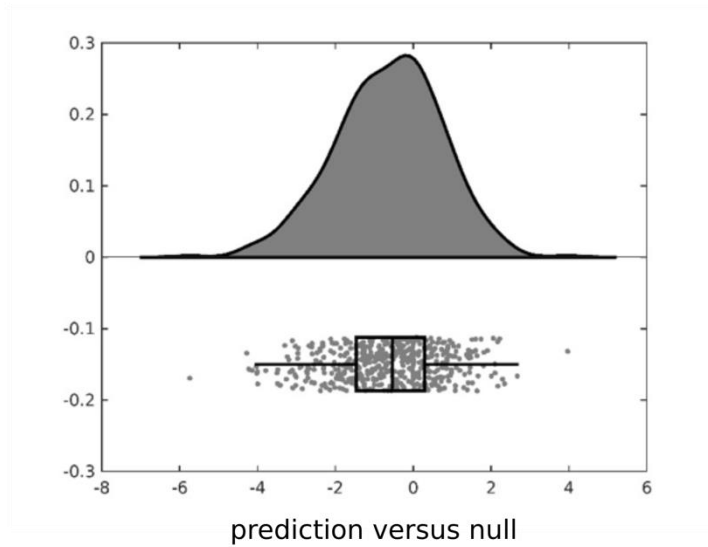

**Figure S3.** The spread of this prediction accuracy for child's learning ability from their cognitive profile. Related to Figure 2A.

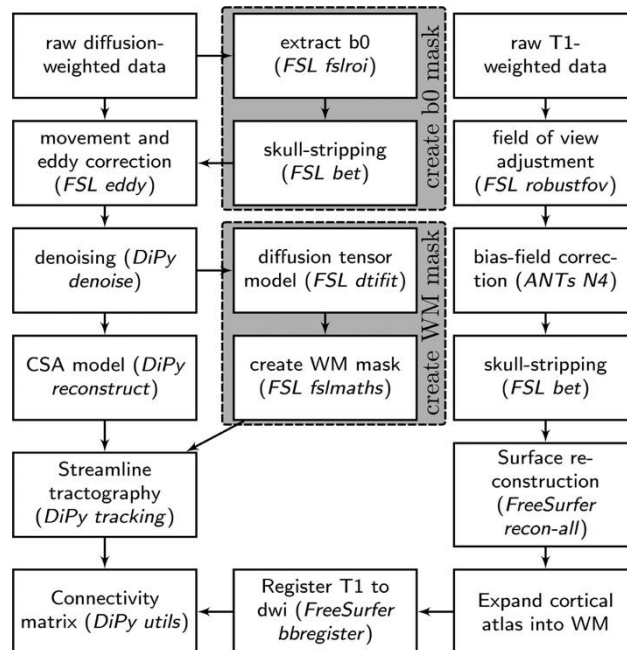

**Figure S4.** Diffusion weighted imaging (DWI) data preprocessing. Related to STAR Methods. Overview of processing steps to reconstruct a white matter connectome from diffusion-weighted and T1-weighted MRI data.

| Group              | Total | Boys        | Age<br>(mean±SEM) | Age range<br>(months) |
|--------------------|-------|-------------|-------------------|-----------------------|
| Referrals          | 337   | 232 (68.8%) | 117.1±1.54        | 62-223                |
| Controls           | 142   | 67 (47%)    | 119.1±1.51        | 81-189                |
| Only with DWI data | 205   | 119(58%)    | 115.2±1.7         | 66-215                |
| Total              | 479   | 299 (62.4%) | 117±1.52          | 62-223                |

Table S1. Demographic information of the whole sample and subsample with DWI data. Related to STAR Methods.

|                  | Non-referred<br>Mean ± SEM | Referred<br>Mean ± SEM | t-test | P                     | Effect size<br>Cohen's d |
|------------------|----------------------------|------------------------|--------|-----------------------|--------------------------|
| Matrix Reasoning | -0.01 ± 0.11               | -0.61 ± 0.07           | 4.51   | 1.08x10 <sup>-5</sup> | 0.66                     |
| Vocabulary       | 0.73 ± 0.12                | -0.01 ± 0.1            | 5.22   | 4.33x10 <sup>-7</sup> | 0.77                     |
| Alliteration     | -0.06 ± 0.04               | -0.57 ± 0.06           | 6.06   | 6.4x10 <sup>-9</sup>  | 0.89                     |
| Forwards Digit   | 0.32 ± 0.11                | -0.38 ± 0.09           | 4.6    | 7.16x10 <sup>-6</sup> | 0.68                     |
| Dot Matrix       | 0.32 ± 0.12                | -0.36 ± 0.08           | 4.76   | 3.72x10 <sup>-6</sup> | 0.70                     |
| Backward Span    | 0.26 ± 0.12                | -0.5 ± 0.07            | 5.76   | 3.02x10 <sup>-8</sup> | 0.85                     |
| Mister X         | 0.51 ± 0.12                | -0.19 ± 0.08           | 4.96   | 1.51x10 <sup>-6</sup> | 0.73                     |
| Literacy         | 0.33 ± 0.01                | -1.22 ± 0.07           | 12.23  | 2.2x10 <sup>-16</sup> | 1.80                     |
| Numeracy         | 0.01 ± 0.12                | -1.03 ± 0.1            | 6.17   | 3.56x10 <sup>-9</sup> | 0.91                     |

Table S2. Data are represented as mean ± SEM for referred and non-referred sample. Related to the table in STAR Methods. Data only from subsample of children who had DWI data, N=205. All scores are given as z scores, relative to the age standardised normative sample for each test.

|                |      | Cognitive profiles |        |        |        |        |        |
|----------------|------|--------------------|--------|--------|--------|--------|--------|
|                |      | Cog P1             | Cog P2 | Cog P3 | Cog P4 | Cog P5 | Cog P6 |
| Brain profiles | BP1  | 3                  | 6      | 6      | 8      | 5      | 9      |
|                | BP2  | 6                  | 3      | 8      | 10     | 2      | 4      |
|                | BP3  | 10                 | 8      | 5      | 8      | 2      | 9      |
|                | BP4  | 9                  | 11     | 7      | 7      | 4      | 8      |
|                | BP5  | 8                  | 4      | 4      | 15     | 0      | 7      |
|                | BP6  | 7                  | 8      | 5      | 8      | 1      | 8      |
|                | BP7  | 0                  | 1      | 1      | 1      | 3      | 3      |
|                | BP8  | 1                  | 2      | 1      | 4      | 2      | 3      |
|                | BP9  | 3                  | 1      | 5      | 3      | 5      | 7      |
|                | BP10 | 1                  | 2      | 12     | 5      | 11     | 11     |
|                | BP11 | 2                  | 1      | 11     | 2      | 3      | 5      |
|                | BP12 | 14                 | 1      | 7      | 7      | 5      | 5      |
|                | BP13 | 1                  | 0      | 8      | 4      | 7      | 10     |
|                | BP14 | 0                  | 2      | 6      | 6      | 7      | 10     |
|                | BP15 | 4                  | 1      | 7      | 4      | 8      | 10     |

Table S3. Distribution of the participants per node in Morphology-Cognition mapping. Related to Figure 5A.

|              |        | Brain profiles |          |          |
|--------------|--------|----------------|----------|----------|
|              |        | Brain P1       | Brain P2 | Brain P3 |
| Cog Profiles | Cog P1 |                |          |          |
|              | Cog P2 |                |          |          |
|              | Cog P3 | 212            | 298      | 420      |
|              | Cog P4 | 288            | 202      | 80       |
|              | Cog P5 |                |          |          |
|              | Cog P6 |                |          |          |

**Table S4. Distribution of the participants per node showing changes in severity. Related to Figure 5B.**

|              |        | Brain profiles |          |          |
|--------------|--------|----------------|----------|----------|
|              |        | Brain P1       | Brain P2 | Brain P3 |
| Cog Profiles | Cog P1 | 10             | 23       | 31       |
|              | Cog P2 | 1              | 3        | 0        |
|              | Cog P3 | 437            | 377      | 323      |
|              | Cog P4 | 40             | 87       | 17       |
|              | Cog P5 | 3              | 2        | 12       |
|              | Cog P6 | 9              | 8        | 117      |

**Table S5. Distribution of the participants per node showing changes in location. Related to Figure 5C.**

| Group\Node                | Node 1         | Node 2         | Node 3         | Node 4         | Node 5         | Node 6          |
|---------------------------|----------------|----------------|----------------|----------------|----------------|-----------------|
| <b>Referred</b>           | 35 (10.4%)     | 16 (4.7%)      | 74 (22%)       | 55 (16.3%)     | 65 (19.3%)     | 92 (27.2%)      |
| <b>Controls</b>           | 34 (24%)       | 35 (25%)       | 19 (13%)       | 37 (26%)       | 0 (0%)         | 17(12%)         |
| <b>Total</b>              | 69<br>(11.41%) | 51<br>(10.65%) | 93<br>(19.42%) | 92<br>(19.21%) | 65<br>(13.57%) | 109<br>(22.76%) |
| <b>Only with DWI data</b> |                |                |                |                |                |                 |
| <b>Referred</b>           | 13(9.6%)       | 5(3.7%)        | 40(29.6%)      | 22(16.3%)      | 26(19.3%)      | 29(21.5)        |
| <b>Controls</b>           | 17(24%)        | 14(20%)        | 10(14.3%)      | 17(24.3%)      | 0              | 12(17.1%)       |
| <b>Total</b>              | 30(14.6%)      | 19(9.3%)       | 50(24.4%)      | 39(19%)        | 26(12.7%)      | 41(20%)         |

**Table S6. Distribution of participants in the whole sample and subsample with DWI data. Related to Figure 2A.**

|                       | <b>Cog N1</b> | <b>Cog N2</b> | <b>Cog N3</b> | <b>Cog N4</b> | <b>Cog N5</b> | <b>Cog N6</b> |
|-----------------------|---------------|---------------|---------------|---------------|---------------|---------------|
| <b>Matrix</b>         |               |               |               |               |               |               |
| <b>Reasoning</b>      | -0.10±0.08    | 1.15±0.12     | -0.70±0.06    | 0.08±0.08     | -1.46±0.08    | -0.88±0.06    |
| <b>Vocabulary</b>     | 0.72±0.08     | 1.41±0.11     | -0.47±0.06    | 1.22±0.08     | -1.34±0.12    | 0.11±0.05     |
| <b>Alliteration</b>   | -0.09±0.05    | 0.03±0.02     | -0.66±0.07    | -0.12±0.04    | -1.14±0.08    | -0.47±0.05    |
| <b>Forwards Digit</b> | 0.25±0.10     | 1.41±0.12     | -0.53±0.09    | 0.14±0.09     | -1.57±0.08    | -0.45±0.08    |
| <b>Dot Matrix</b>     | 0.58±0.09     | 0.88±0.12     | 0.16±0.06     | -0.31±0.08    | -1.30±0.09    | -1.40±0.05    |
| <b>Backward Span</b>  | 0.25±0.08     | 1.22±0.13     | -0.46±0.06    | -0.11±0.08    | -1.15±0.07    | -0.82±0.06    |
| <b>Mister X</b>       | 1.36±0.08     | 1.27±0.11     | 0.01±0.08     | -0.26±0.07    | -1.05±0.09    | -0.42±0.07    |
| <b>Literacy</b>       | -0.14±0.10    | 0.50±0.11     | -1.12±0.08    | -0.31±0.12    | -1.65±0.10    | -0.95±0.08    |
| <b>Numeracy</b>       | 0.21±0.12     | 0.78±0.13     | -1.11±0.10    | 0.16±0.10     | -1.77±0.13    | -0.78±0.09    |

**Table S7. Data are represented as mean ± SEM for each of cognitive groupings. Related to Figure 2B.**
